# Supplementary material
Source: HighWire-hosted journal article supplement (https://bmjopen.bmj.com/content/11/1/e040424)
Supplement: inline-supplementary-material-1 [file inline-supplementary-material-1.pdf]

Supplementary materials

Table 1 Logistic regressions on tobacco-cessation treatments among Taiwanese adults aged 18 years or above among light smokers (pre- and post-policy)

| Variables | Treatment use        |                                          |                          |                                                                     | Any treatment                                              | A smoking cessation clinic                             | A pharmacy                                             | Combination of a smoking cessation clinic and pharmacy <sup>c</sup> |
|-----------|----------------------|------------------------------------------|--------------------------|---------------------------------------------------------------------|------------------------------------------------------------|--------------------------------------------------------|--------------------------------------------------------|---------------------------------------------------------------------|
|           | None (%) / Mean ± SD | Smoking cessation clinic (%) / Mean ± SD | Pharmacy (%) / Mean ± SD | Combining a smoking cessation clinic and a pharmacy (%) / Mean ± SD | B + C + D <sup>a</sup> A <sup>b</sup> Adjusted OR (95% CI) | B + D <sup>a</sup> A <sup>b</sup> Adjusted OR (95% CI) | C + D <sup>a</sup> A <sup>b</sup> Adjusted OR (95% CI) | D <sup>a</sup> A <sup>b</sup> Adjusted OR (95% CI)                  |
| Policy    | 3197 (82.0%)         | SD 499 (12.8%)                           | 184 (4.7%)               | 20 (0.5%)                                                           |                                                            |                                                        |                                                        |                                                                     |
|           | A                    | B                                        | C                        | D                                                                   |                                                            |                                                        |                                                        |                                                                     |

Table 1 Logistic regressions on tobacco-cessation treatments among Taiwanese adults aged 18 years or above among light smokers (pre- and post-policy)

| Variables                 | Treatment use        |                                          |                          |                                                                     | Any treatment                                                  | A smoking cessation clinic                                 | A pharmacy                                                 | Combination of a smoking cessation clinic and pharmacy <sup>c</sup> |
|---------------------------|----------------------|------------------------------------------|--------------------------|---------------------------------------------------------------------|----------------------------------------------------------------|------------------------------------------------------------|------------------------------------------------------------|---------------------------------------------------------------------|
|                           | None (%) / Mean ± SD | Smoking cessation clinic (%) / Mean ± SD | Pharmacy (%) / Mean ± SD | Combining a smoking cessation clinic and a pharmacy (%) / Mean ± SD | B + C + D <sup>a</sup> / A <sup>b</sup> / Adjusted OR (95% CI) | B + D <sup>a</sup> / A <sup>b</sup> / Adjusted OR (95% CI) | C + D <sup>a</sup> / A <sup>b</sup> / Adjusted OR (95% CI) | D <sup>a</sup> / A <sup>b</sup> / Adjusted OR (95% CI)              |
| Before policy (2010-2011) | 838 (84.8)           | 112 (11.3)                               | 35 (3.5)                 | 3 (0.3)                                                             | Ref.                                                           | Ref.                                                       | Ref.                                                       | -                                                                   |
| After policy (2013-2014)  | 807 (85.6)           | 94 (10.0)                                | 41 (4.3)                 | 1 (0.1)                                                             | 0.852 (0.640 – 1.136)                                          | 0.807 (0.581 – 1.122)                                      | 0.984 (0.591 – 1.641)                                      | -                                                                   |

Table 1 Logistic regressions on tobacco-cessation treatments among Taiwanese adults aged 18 years or above among light smokers (pre- and post-policy)

| Variables | Treatment use                       |                                                        |                                       |                                                                                 | Any treatment                                              | A smoking cessation clinic                             | A pharmacy                                             | Combination of a smoking cessation clinic and pharmacy <sup>c</sup> |
|-----------|-------------------------------------|--------------------------------------------------------|---------------------------------------|---------------------------------------------------------------------------------|------------------------------------------------------------|--------------------------------------------------------|--------------------------------------------------------|---------------------------------------------------------------------|
|           | None (%) / Mean ± SD 3197 (82.0%) A | Smoking cessation clinic (%) / Mean ± SD 499 (12.8%) B | Pharmacy (%) / Mean ± SD 184 (4.7%) C | Combining a smoking cessation clinic and a pharmacy (%) / Mean ± SD 20 (0.5%) D | B + C + D <sup>a</sup> A <sup>b</sup> Adjusted OR (95% CI) | B + D <sup>a</sup> A <sup>b</sup> Adjusted OR (95% CI) | C + D <sup>a</sup> A <sup>b</sup> Adjusted OR (95% CI) | D <sup>a</sup> A <sup>b</sup> Adjusted OR (95% CI)                  |
| Gender    |                                     |                                                        |                                       |                                                                                 |                                                            |                                                        |                                                        |                                                                     |
| Male      | 1791 (86.6)                         | 186 (9.0)                                              | 81 (3.9)                              | 9 (0.4)                                                                         | Ref.                                                       | Ref.                                                   | Ref.                                                   | -                                                                   |
| Female    | 315                                 | 44 (11.7)                                              | 17 (4.5)                              | 0                                                                               | 1.096 (0.738                                               | 1.239 (0.798                                           | 0.670 (0.293                                           | -                                                                   |

Table 1 Logistic regressions on tobacco-cessation treatments among Taiwanese adults aged 18 years or above among light smokers (pre- and post-policy)

| Variables       | Treatment use                       |                                                        |                                       |                                                                                 | Any treatment                                              | A smoking cessation clinic                             | A pharmacy                                             | Combination of a smoking cessation clinic and pharmacy <sup>c</sup> |
|-----------------|-------------------------------------|--------------------------------------------------------|---------------------------------------|---------------------------------------------------------------------------------|------------------------------------------------------------|--------------------------------------------------------|--------------------------------------------------------|---------------------------------------------------------------------|
|                 | None (%) / Mean ± SD 3197 (82.0%) A | Smoking cessation clinic (%) / Mean ± SD 499 (12.8%) B | Pharmacy (%) / Mean ± SD 184 (4.7%) C | Combining a smoking cessation clinic and a pharmacy (%) / Mean ± SD 20 (0.5%) D | B + C + D <sup>a</sup> A <sup>b</sup> Adjusted OR (95% CI) | B + D <sup>a</sup> A <sup>b</sup> Adjusted OR (95% CI) | C + D <sup>a</sup> A <sup>b</sup> Adjusted OR (95% CI) | D <sup>a</sup> A <sup>b</sup> Adjusted OR (95% CI)                  |
| Age             | (83.8) 43.65 ± 15.34                | 43.47 ± 13.15                                          | 42.05 ± 13.94                         | 40.67 ± 17.10                                                                   | – 1.629) 0.992 (0.979 – 1.005)                             | – 1.925) 0.991 (0.976 – 1.006)                         | – 1.533) 0.994 (0.970 – 1.018)                         | -                                                                   |
| Education level |                                     |                                                        |                                       |                                                                                 |                                                            |                                                        |                                                        |                                                                     |

Table 1 Logistic regressions on tobacco-cessation treatments among Taiwanese adults aged 18 years or above among light smokers (pre- and post-policy)

| Variables           | Treatment use                       |                                                        |                                       |                                                                                 | Any treatment                                              | A smoking cessation clinic                             | A pharmacy                                             | Combination of a smoking cessation clinic and pharmacy <sup>c</sup> |
|---------------------|-------------------------------------|--------------------------------------------------------|---------------------------------------|---------------------------------------------------------------------------------|------------------------------------------------------------|--------------------------------------------------------|--------------------------------------------------------|---------------------------------------------------------------------|
|                     | None (%) / Mean ± SD 3197 (82.0%) A | Smoking cessation clinic (%) / Mean ± SD 499 (12.8%) B | Pharmacy (%) / Mean ± SD 184 (4.7%) C | Combining a smoking cessation clinic and a pharmacy (%) / Mean ± SD 20 (0.5%) D | B + C + D <sup>a</sup> A <sup>b</sup> Adjusted OR (95% CI) | B + D <sup>a</sup> A <sup>b</sup> Adjusted OR (95% CI) | C + D <sup>a</sup> A <sup>b</sup> Adjusted OR (95% CI) | D <sup>a</sup> A <sup>b</sup> Adjusted OR (95% CI)                  |
| Elementary or below | 185 (88.1)                          | 19 (9.0)                                               | 6 (2.9)                               | 0                                                                               | Ref.                                                       | Ref.                                                   | Ref.                                                   | -                                                                   |
| Junior high school  | 286 (89.1)                          | 21 (6.5)                                               | 13 (4.0)                              | 1 (0.3)                                                                         | 0.875 (0.426 – 1.798)                                      | 0.729 (0.316 – 1.680)                                  | 1.421 (0.357 – 5.652)                                  | -                                                                   |

Table 1 Logistic regressions on tobacco-cessation treatments among Taiwanese adults aged 18 years or above among light smokers (pre- and post-policy)

| Variables      | Treatment use        |                                          |                          |                                                                     | Any treatment                                                  | A smoking cessation clinic                                 | A pharmacy                                                 | Combination of a smoking cessation clinic and pharmacy <sup>c</sup> |
|----------------|----------------------|------------------------------------------|--------------------------|---------------------------------------------------------------------|----------------------------------------------------------------|------------------------------------------------------------|------------------------------------------------------------|---------------------------------------------------------------------|
|                | None (%) / Mean ± SD | Smoking cessation clinic (%) / Mean ± SD | Pharmacy (%) / Mean ± SD | Combining a smoking cessation clinic and a pharmacy (%) / Mean ± SD | B + C + D <sup>a</sup> / A <sup>b</sup> / Adjusted OR (95% CI) | B + D <sup>a</sup> / A <sup>b</sup> / Adjusted OR (95% CI) | C + D <sup>a</sup> / A <sup>b</sup> / Adjusted OR (95% CI) | D <sup>a</sup> / A <sup>b</sup> / Adjusted OR (95% CI)              |
|                | 3197 (82.0%)         | 499 (12.8%)                              | 184 (4.7%)               | 20 (0.5%)                                                           |                                                                |                                                            |                                                            |                                                                     |
| High school    | 854 (86.3)           | 100 (10.1)                               | 35 (3.5)                 | 0                                                                   | 1.266 (0.658 – 2.438)                                          | 1.338 (0.643 – 2.786)                                      | 1.159 (0.305 – 4.410)                                      | -                                                                   |
| Junior college | 293 (83.0)           | 41 (11.6)                                | 15 (4.2)                 | 4 (1.1)                                                             | 1.565 (0.768 – 3.190)                                          | 1.490 (0.665 – 3.340)                                      | 2.229 (0.558 – 8.901)                                      | -                                                                   |

Table 1 Logistic regressions on tobacco-cessation treatments among Taiwanese adults aged 18 years or above among light smokers (pre- and post-policy)

| Variables              | Treatment use                       |                                                        |                                       |                                                                                 | Any treatment                                              | A smoking cessation clinic                             | A pharmacy                                             | Combination of a smoking cessation clinic and pharmacy <sup>c</sup> |
|------------------------|-------------------------------------|--------------------------------------------------------|---------------------------------------|---------------------------------------------------------------------------------|------------------------------------------------------------|--------------------------------------------------------|--------------------------------------------------------|---------------------------------------------------------------------|
|                        | None (%) / Mean ± SD 3197 (82.0%) A | Smoking cessation clinic (%) / Mean ± SD 499 (12.8%) B | Pharmacy (%) / Mean ± SD 184 (4.7%) C | Combining a smoking cessation clinic and a pharmacy (%) / Mean ± SD 20 (0.5%) D | B + C + D <sup>a</sup> A <sup>b</sup> Adjusted OR (95% CI) | B + D <sup>a</sup> A <sup>b</sup> Adjusted OR (95% CI) | C + D <sup>a</sup> A <sup>b</sup> Adjusted OR (95% CI) | D <sup>a</sup> A <sup>b</sup> Adjusted OR (95% CI)                  |
| Undergraduate or above | 486 (85.6)                          | 49 (8.6)                                               | 29 (5.1)                              | 4 (0.7)                                                                         | 1.339 (0.654 – 2.741)                                      | 1.339 (0.595 – 3.015)                                  | 1.675 (0.409 – 6.858)                                  | -                                                                   |
| Marital status         |                                     |                                                        |                                       |                                                                                 |                                                            |                                                        |                                                        |                                                                     |
| Single                 | 604                                 | 49 (7.2)                                               | 27 (4.0)                              | 2 (0.3)                                                                         | Ref.                                                       | Ref.                                                   | Ref.                                                   | -                                                                   |

Table 1 Logistic regressions on tobacco-cessation treatments among Taiwanese adults aged 18 years or above among light smokers (pre- and post-policy)

| Variables                 | Treatment use                       |                                                        |                                       |                                                                                 | Any treatment                                              | A smoking cessation clinic                             | A pharmacy                                             | Combination of a smoking cessation clinic and pharmacy <sup>c</sup> |
|---------------------------|-------------------------------------|--------------------------------------------------------|---------------------------------------|---------------------------------------------------------------------------------|------------------------------------------------------------|--------------------------------------------------------|--------------------------------------------------------|---------------------------------------------------------------------|
|                           | None (%) / Mean ± SD 3197 (82.0%) A | Smoking cessation clinic (%) / Mean ± SD 499 (12.8%) B | Pharmacy (%) / Mean ± SD 184 (4.7%) C | Combining a smoking cessation clinic and a pharmacy (%) / Mean ± SD 20 (0.5%) D | B + C + D <sup>a</sup> A <sup>b</sup> Adjusted OR (95% CI) | B + D <sup>a</sup> A <sup>b</sup> Adjusted OR (95% CI) | C + D <sup>a</sup> A <sup>b</sup> Adjusted OR (95% CI) | D <sup>a</sup> A <sup>b</sup> Adjusted OR (95% CI)                  |
| Married                   | (88.6) 1346 (85.2)                  | 162 (10.3)                                             | 64 (4.1)                              | 7 (0.4)                                                                         | 1.541 (1.034 – 2.297)                                      | 1.822 (1.143 – 2.905)                                  | 0.981 (0.493 – 1.951)                                  | -                                                                   |
| Divorced/widowed/separate | 153                                 | 18 (10.1)                                              | 7 (3.9)                               | 0                                                                               | 1.757 (0.940                                               | 1.882 (0.907                                           | 1.433 (0.485                                           | -                                                                   |



Table 1 Logistic regressions on tobacco-cessation treatments among Taiwanese adults aged 18 years or above among light smokers (pre- and post-policy)

| Variables                      | Treatment use                       |                                                        |                                       |                                                                                 | Any treatment                                              | A smoking cessation clinic                             | A pharmacy                                             | Combination of a smoking cessation clinic and pharmacy <sup>c</sup> |
|--------------------------------|-------------------------------------|--------------------------------------------------------|---------------------------------------|---------------------------------------------------------------------------------|------------------------------------------------------------|--------------------------------------------------------|--------------------------------------------------------|---------------------------------------------------------------------|
|                                | None (%) / Mean ± SD 3197 (82.0%) A | Smoking cessation clinic (%) / Mean ± SD 499 (12.8%) B | Pharmacy (%) / Mean ± SD 184 (4.7%) C | Combining a smoking cessation clinic and a pharmacy (%) / Mean ± SD 20 (0.5%) D | B + C + D <sup>a</sup> A <sup>b</sup> Adjusted OR (95% CI) | B + D <sup>a</sup> A <sup>b</sup> Adjusted OR (95% CI) | C + D <sup>a</sup> A <sup>b</sup> Adjusted OR (95% CI) | D <sup>a</sup> A <sup>b</sup> Adjusted OR (95% CI)                  |
| d                              | (86.0)                              |                                                        |                                       |                                                                                 | – 3.284)                                                   | – 3.903)                                               | – 4.237)                                               |                                                                     |
| Monthly household income (NTU) |                                     |                                                        |                                       |                                                                                 |                                                            |                                                        |                                                        |                                                                     |
| ≤ 20000                        | 291                                 | 33 (9.9)                                               | 10 (3.0)                              | 1 (0.3)                                                                         | Ref.                                                       | Ref.                                                   | Ref.                                                   | -                                                                   |

Table 1 Logistic regressions on tobacco-cessation treatments among Taiwanese adults aged 18 years or above among light smokers (pre- and post-policy)

| Variables      | Treatment use                       |                                                        |                                       |                                                                                 | Any treatment                                              | A smoking cessation clinic                             | A pharmacy                                             | Combination of a smoking cessation clinic and pharmacy <sup>c</sup> |
|----------------|-------------------------------------|--------------------------------------------------------|---------------------------------------|---------------------------------------------------------------------------------|------------------------------------------------------------|--------------------------------------------------------|--------------------------------------------------------|---------------------------------------------------------------------|
|                | None (%) / Mean ± SD 3197 (82.0%) A | Smoking cessation clinic (%) / Mean ± SD 499 (12.8%) B | Pharmacy (%) / Mean ± SD 184 (4.7%) C | Combining a smoking cessation clinic and a pharmacy (%) / Mean ± SD 20 (0.5%) D | B + C + D <sup>a</sup> A <sup>b</sup> Adjusted OR (95% CI) | B + D <sup>a</sup> A <sup>b</sup> Adjusted OR (95% CI) | C + D <sup>a</sup> A <sup>b</sup> Adjusted OR (95% CI) | D <sup>a</sup> A <sup>b</sup> Adjusted OR (95% CI)                  |
| 20001 to 40000 | (86.9) 485 (88.5)                   | 38 (6.9)                                               | 22 (4.0)                              | 3 (0.5)                                                                         | 0.963 (0.548 – 1.695)                                      | 1.175 (0.623 – 2.214)                                  | 0.560 (0.185 – 1.697)                                  | -                                                                   |
| 40001 to 60000 | 421                                 | 43 (8.9)                                               | 19 (3.9)                              | 1 (0.2)                                                                         | 0.713 (0.439                                               | 0.619 (0.348                                           | 1.016 (0.460                                           | -                                                                   |

Table 1 Logistic regressions on tobacco-cessation treatments among Taiwanese adults aged 18 years or above among light smokers (pre- and post-policy)

| Variables      | Treatment use                       |                                                        |                                       |                                                                                 | Any treatment                                              | A smoking cessation clinic                             | A pharmacy                                             | Combination of a smoking cessation clinic and pharmacy <sup>c</sup> |
|----------------|-------------------------------------|--------------------------------------------------------|---------------------------------------|---------------------------------------------------------------------------------|------------------------------------------------------------|--------------------------------------------------------|--------------------------------------------------------|---------------------------------------------------------------------|
|                | None (%) / Mean ± SD 3197 (82.0%) A | Smoking cessation clinic (%) / Mean ± SD 499 (12.8%) B | Pharmacy (%) / Mean ± SD 184 (4.7%) C | Combining a smoking cessation clinic and a pharmacy (%) / Mean ± SD 20 (0.5%) D | B + C + D <sup>a</sup> A <sup>b</sup> Adjusted OR (95% CI) | B + D <sup>a</sup> A <sup>b</sup> Adjusted OR (95% CI) | C + D <sup>a</sup> A <sup>b</sup> Adjusted OR (95% CI) | D <sup>a</sup> A <sup>b</sup> Adjusted OR (95% CI)                  |
| 60001 to 80000 | (87.0) 279                          | 34 (10.6)                                              | 9 (2.8)                               | 0                                                                               | − 1.158) 0.816 (0.510                                      | − 1.100) 0.819 (0.476                                  | − 2.246) 0.778 (0.343                                  | -                                                                   |
| 80001 to 10000 | (86.6) 162                          | 22 (11.2)                                              | 10 (5.1)                              | 2 (1.0)                                                                         | − 1.306) 0.867 (0.529                                      | − 1.408) 0.945 (0.540                                  | − 1.765) 0.616 (0.245                                  | -                                                                   |

Table 1 Logistic regressions on tobacco-cessation treatments among Taiwanese adults aged 18 years or above among light smokers (pre- and post-policy)

| Variables      | Treatment use        |                                          |                          |                                                                     | Any treatment                                                  | A smoking cessation clinic                                 | A pharmacy                                                 | Combination of a smoking cessation clinic and pharmacy <sup>c</sup> |
|----------------|----------------------|------------------------------------------|--------------------------|---------------------------------------------------------------------|----------------------------------------------------------------|------------------------------------------------------------|------------------------------------------------------------|---------------------------------------------------------------------|
|                | None (%) / Mean ± SD | Smoking cessation clinic (%) / Mean ± SD | Pharmacy (%) / Mean ± SD | Combining a smoking cessation clinic and a pharmacy (%) / Mean ± SD | B + C + D <sup>a</sup> / A <sup>b</sup> / Adjusted OR (95% CI) | B + D <sup>a</sup> / A <sup>b</sup> / Adjusted OR (95% CI) | C + D <sup>a</sup> / A <sup>b</sup> / Adjusted OR (95% CI) | D <sup>a</sup> / A <sup>b</sup> / Adjusted OR (95% CI)              |
| Smoking status | (82.7)               |                                          |                          |                                                                     | – 1.421)                                                       | – 1.655)                                                   | – 1.549)                                                   |                                                                     |
|                | ≥ 100001             | 232 (83.5)                               | 29 (10.4)                | 15 (5.4)                                                            | 2 (0.7)                                                        | 1.013 (0.592                                               | 0.967 (0.517                                               | 1.160 (0.484 -                                                      |
|                |                      |                                          |                          |                                                                     |                                                                | – 1.732)                                                   | – 1.806)                                                   | – 2.785)                                                            |

Table 1 Logistic regressions on tobacco-cessation treatments among Taiwanese adults aged 18 years or above among light smokers (pre- and post-policy)

| Variables | Treatment use                       |                                                        |                                       |                                                                                 | Any treatment                                              | A smoking cessation clinic                             | A pharmacy                                             | Combination of a smoking cessation clinic and pharmacy <sup>c</sup> |
|-----------|-------------------------------------|--------------------------------------------------------|---------------------------------------|---------------------------------------------------------------------------------|------------------------------------------------------------|--------------------------------------------------------|--------------------------------------------------------|---------------------------------------------------------------------|
|           | None (%) / Mean ± SD 3197 (82.0%) A | Smoking cessation clinic (%) / Mean ± SD 499 (12.8%) B | Pharmacy (%) / Mean ± SD 184 (4.7%) C | Combining a smoking cessation clinic and a pharmacy (%) / Mean ± SD 20 (0.5%) D | B + C + D <sup>a</sup> A <sup>b</sup> Adjusted OR (95% CI) | B + D <sup>a</sup> A <sup>b</sup> Adjusted OR (95% CI) | C + D <sup>a</sup> A <sup>b</sup> Adjusted OR (95% CI) | D <sup>a</sup> A <sup>b</sup> Adjusted OR (95% CI)                  |
| Everyday  | 1394 (84.8)                         | 167 (10.2)                                             | 75 (4.6)                              | 8 (0.5)                                                                         | Ref.                                                       | Ref.                                                   | Ref.                                                   | -                                                                   |
| Some days | 712 (89.1)                          | 63 (7.9)                                               | 23 (2.9)                              | 1 (0.1)                                                                         | 1.463 (1.071 – 1.999)                                      | 1.405 (0.985 – 2.004)                                  | 1.640 (0.922 – 2.917)                                  | -                                                                   |

Table 1 Logistic regressions on tobacco-cessation treatments among Taiwanese adults aged 18 years or above among light smokers (pre- and post-policy)

| Variables            | Treatment use        |                                          |                          |                                                                     | Any treatment                                 | A smoking cessation clinic                | A pharmacy                                | Combination of a smoking cessation clinic and pharmacy <sup>c</sup> |
|----------------------|----------------------|------------------------------------------|--------------------------|---------------------------------------------------------------------|-----------------------------------------------|-------------------------------------------|-------------------------------------------|---------------------------------------------------------------------|
|                      | None (%) / Mean ± SD | Smoking cessation clinic (%) / Mean ± SD | Pharmacy (%) / Mean ± SD | Combining a smoking cessation clinic and a pharmacy (%) / Mean ± SD | B + C + D <sup>a</sup> / Adjusted OR (95% CI) | B + D <sup>a</sup> / Adjusted OR (95% CI) | C + D <sup>a</sup> / Adjusted OR (95% CI) | D <sup>a</sup> / Adjusted OR (95% CI)                               |
| Self-reported health | 3.77 ± 1.04          | 3.70 ± 1.03                              | 3.66 ± 1.06              | 3.89 ± 0.78                                                         | 0.919 (0.806 – 1.048)                         | 0.933 (0.804 – 1.084)                     | 0.885 (0.703 – 1.115)                     | -                                                                   |

<sup>a</sup> Categories in the index group, indicated by letters corresponding to columns under treatment use.

<sup>b</sup> Reference category for comparison to index group directly above, indicated by letters corresponding to columns under treatment use.

c The analysis was not completed because the number of using combining a smoking cessation clinic and a pharmacy was only 9.
